# Supplementary material for: TANGO1 inhibitors reduce collagen secretion and limit tissue scarring
Source: PubMed Central journal article supplement (PMC11043333; doi:10.1038/s41467-024-47004-1), 2024-04-24
Supplement: 41467_2024_47004_MOESM1_ESM.pdf [file 41467_2024_47004_MOESM1_ESM.pdf]

1 **Supplementary Figures**

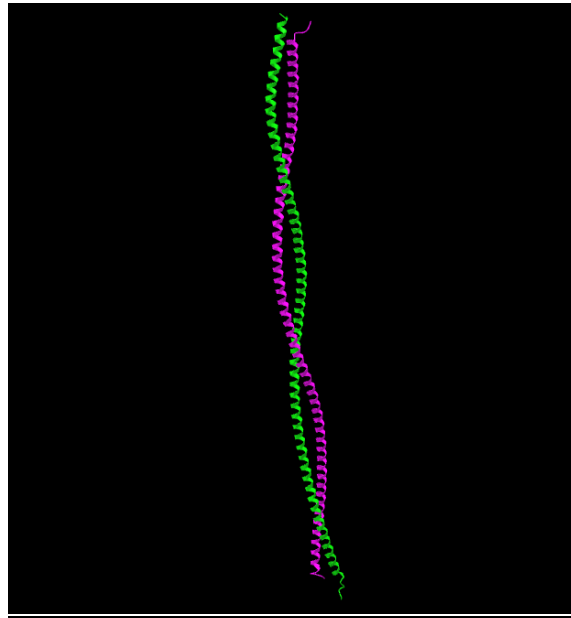

2  
3 **Supplementary figure 1**

4 Structure prediction of the TANGO1-cTAGE5 dimeric region from AlphaFold2.

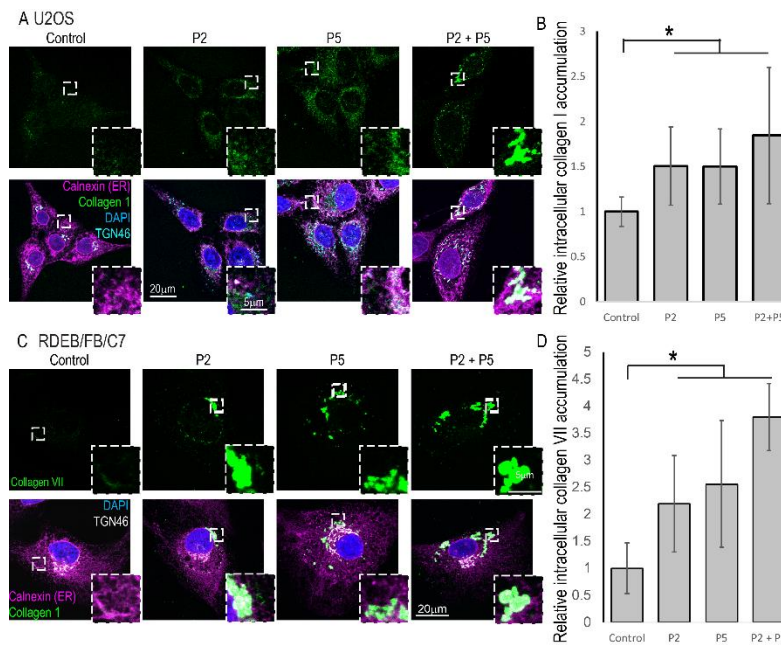

6 **Supplementary figure 2.** Peptide inhibitors bring about collagen retention in the ER.

7 (A) U2OS cells treated with peptides show accumulations of collagen I (green) in the  
8 ER (magenta). (B) Quantification of the intracellular collagen I accumulation  
9 (normalized to control) (C) RDEB/FB/C7 cells treated with peptides show  
10 accumulations of collagen VII (green) in the ER (magenta). (D) Quantification of the  
11 intracellular collagen VII accumulation (normalized to control). Insets show a  
12 magnified section of collagen accumulations. Scale bars 20  $\mu\text{m}$  or insets 5  $\mu\text{m}$ .  
13 \* $p < 0.05$ , Students' t-test.  
14

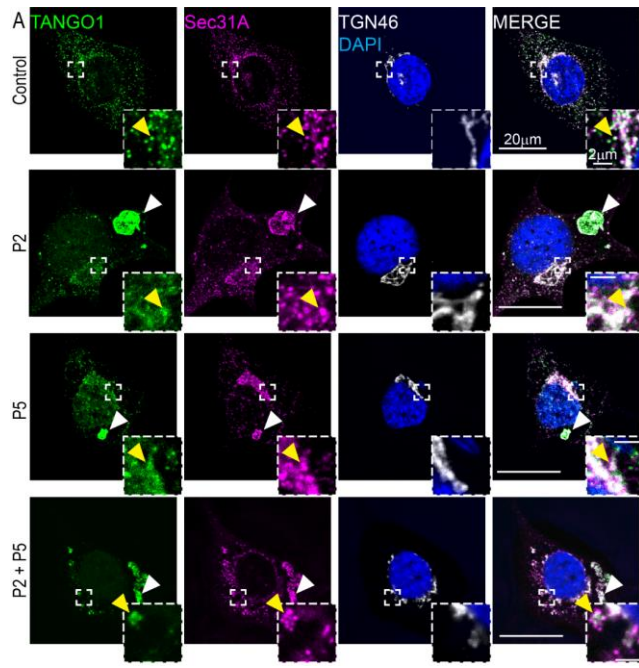

16

17 **Supplementary figure 3.** Peptide inhibitors do not affect TANGO1 localization to  
 18 ERES or collagen recruitment.

19 (A) RDEB/FB/C7 cells treated with peptides show TANGO1 (green) recruitment to  
 20 accumulations of collagen (white arrowheads), as reported before. TANGO1 puncta  
 21 are colocalised with ERES markers Sec31A (magenta). Insets show a magnified  
 22 section of collagen accumulations, yellow arrowheads highlight TANGO1 and  
 23 Sec31A puncta. Scale bars 20 μm or insets 2 μm.

24

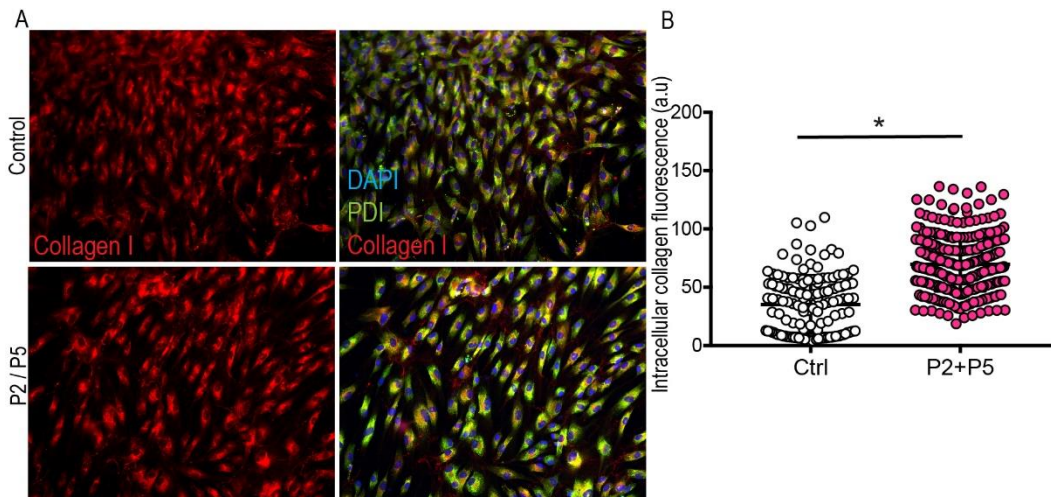

25

26 **Supplementary figure 4.** Peptide inhibitors cause intracellular accumulation of  
 27 collagen

28 (A) Primary skin fibroblasts after 20 h of incubation without (Ctrl) or with the  
 29 combination of P2+P5 at 40 μM and then stained to visualise collagen I (red), PDI  
 30 (green) Scale bar: 50 μm. (B) Quantification of intensity of collagen I staining in  
 31 control (black) vs treated (magenta) fibroblasts in two independent experiments each,  
 32 from two individuals showed a significant but mild difference (\*  $p < 0.0001$ , Mann  
 33 Whitney U, two-tailed). N = 141 (Ctrl) / 329 (P2 + P5) cells. Data shown as mean ±  
 34 SD.

35

36

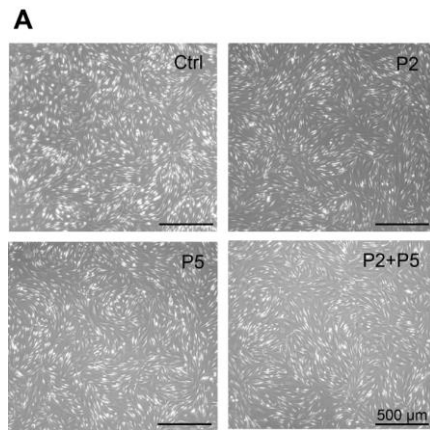

37

38

39

**Supplementary Figure 5.** Peptides do not induce changes in morphology of primary human skin fibroblasts

40

41

42

(A) Representative phase contrast images of primary skin fibroblasts after 20 h of incubation without (Ctrl) and with either P2, P5 or the combination of P2+P5 at 40 μM without serum. Bar: 500 μm.

43

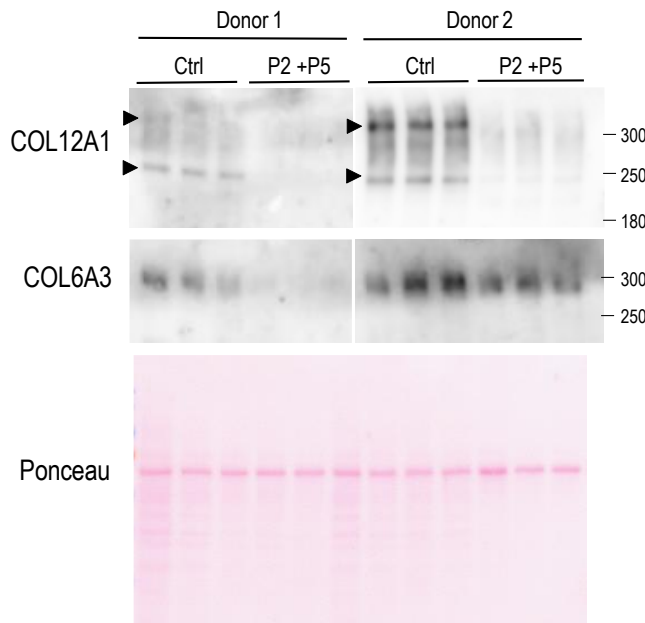

44

45

**Supplementary Figure 6.** Peptides reduce secretion of COL6A1 and COL12A1.

46

47

48

49

50

51

Western blots of supernatants from fibroblasts incubated for 20 h in the absence of serum without (Ctrl) or with 40 μM each of P2+P5. Peptide treatment strongly reduced amounts of secreted COL6A1 and of COL12A1. The long and short splice variants of COL12A1 are indicated by black arrow heads. Exposure times of blots for the two donors differed. Ponceau staining of the corresponding cell lysates indicates comparable cell numbers. N = 2 donors.

52

| Gene names | Protein IDs | Protein names                          | -Log <sub>10</sub> T test P-value (P2P5 vs. Control) | Log <sub>2</sub> FC (P2P5 vs. Control) |
|------------|-------------|----------------------------------------|------------------------------------------------------|----------------------------------------|
| VCAN       | P13611      | Versican core protein                  | 1.81170                                              | -5.19527                               |
| FBN1       | P35555      | Fibrillin-1                            | 4.01801                                              | -4.67462                               |
| COL12A1    | Q99715      | Collagen alpha-1(XII) chain            | 4.37419                                              | -4.67456                               |
| COL3A1     | P02461      | Collagen alpha-1(III) chain            | 3.92008                                              | -3.59692                               |
| COL5A1     | P20908      | Collagen alpha-1(V) chain              | 3.42365                                              | -3.12562                               |
| COL6A3     | P12111      | Collagen alpha-3(VI) chain             | 3.13966                                              | -3.01714                               |
| CTSB       | P07858      | Cathepsin B                            | 2.05424                                              | -2.54762                               |
| COL6A2     | P12110      | Collagen alpha-2(VI) chain             | 1.67596                                              | -2.31061                               |
| LAMA4      | Q16363      | Laminin subunit alpha-4                | 2.61542                                              | -2.25661                               |
| CLU        | P10909      | Clusterin                              | 1.86799                                              | -2.23954                               |
| PDIA3      | P30101      | Protein disulfide-isomerase A3         | 1.95555                                              | -2.19724                               |
| C1S        | P09871      | Complement C1s subcomponent            | 1.90802                                              | -1.85249                               |
| FSTL1      | Q12841      | Follistatin-related protein 1          | 3.09804                                              | -1.83823                               |
| PSAP       | P07602      | Prosaposin                             | 2.03952                                              | -1.74644                               |
| TMSB4X     | P62328      | Thymosin beta-4                        | 1.80659                                              | -1.60465                               |
| COL1A1     | P02452      | Collagen alpha-1(I) chain              | 3.47620                                              | -1.55965                               |
| YWHAZ      | P63104      | 14-3-3 protein zeta/delta              | 2.41210                                              | -1.47430                               |
| RCN1       | Q15293      | Reticulocalbin-1                       | 1.71327                                              | -1.36175                               |
| COL1A2     | P08123      | Collagen alpha-2(I) chain              | 4.02213                                              | -1.33409                               |
| MIA3       | Q5JRA6      | Melanoma inhibitory activity protein 3 | 1.66826                                              | 8.49901                                |
| ACTB       | P60709      | Actin                                  | 2.92456                                              | 1.91751                                |
| ENO1       | P06733      | Alpha-enolase                          | 2.38767                                              | 1.85727                                |
| CFL1       | P23528      | Cofilin-1                              | 2.54660                                              | 1.63683                                |
| LGALS1     | P09382      | Galectin-1                             | 3.19137                                              | 1.63093                                |
| PGK1       | P00558      | Phosphoglycerate kinase 1              | 1.69194                                              | 1.40227                                |
| SERPINE1   | P05121      | Plasminogen activator inhibitor 1      | 3.14065                                              | 1.33331                                |
| VIM        | P08670      | Vimentin                               | 2.92202                                              | 1.31643                                |

Hyposecreted in P2 + P5 treated
  Hypersecreted in P2 + P5 treated

53

54

55

56

**Supplementary Table 1.** List of selected proteins hypo- (in blue) or hypersecreted (in red) in supernatants of primary human skin fibroblasts treated with P2+P5 versus control (secretome).

57

| Gene names | Protein IDs | Protein names                                         | -Log <sub>10</sub> T test P-value (P2P5 vs. Control) | Log <sub>2</sub> FC (P2P5 vs. Control) |
|------------|-------------|-------------------------------------------------------|------------------------------------------------------|----------------------------------------|
| MMP1       | P03956      | Interstitial collagenase                              | 1.70477                                              | 0.83577                                |
| SERPINE2   | P07093      | Glia-derived nexin                                    | 1.24836                                              | 0.71191                                |
| TIMP1      | P01033      | Metalloproteinase inhibitor 1                         | 1.07280                                              | 0.59529                                |
| SPARC      | P09486      | SPARC                                                 | 1.24367                                              | 0.48131                                |
| ANXA2      | P07355      | Annexin A2                                            | 0.59280                                              | 0.41588                                |
| TGFBI      | Q15582      | Transforming growth factor-beta-induced protein ig-h3 | 1.21532                                              | 0.41117                                |
| CYR61      | O00622      | Protein CYR61                                         | 0.73704                                              | 0.29120                                |
| FBLN2      | P98095      | Fibulin-2                                             | 0.70771                                              | 0.27581                                |
| CST3       | P01034      | Cystatin-C                                            | 2.50978                                              | 0.26645                                |
| TIMP2      | P16035      | Metalloproteinase inhibitor 2                         | 0.14051                                              | 0.18951                                |
| MMP2       | P08253      | 72 kDa type IV collagenase                            | 0.21836                                              | 0.16330                                |
| PKM        | P14618      | Pyruvate kinase PKM                                   | 0.05721                                              | 0.04434                                |
| CCDC80     | Q76M96      | Coiled-coil domain-containing protein 80              | 0.00974                                              | 0.00646                                |
| COL6A1     | P12109      | Collagen alpha-1(VI) chain                            | 0.07256                                              | -0.05182                               |
| LUM        | P51884      | Lumican                                               | 0.89805                                              | -0.21413                               |
| POSTN      | Q15063      | Periostin                                             | 0.35686                                              | -0.38590                               |
| SOD1       | P00441      | Superoxide dismutase [Cu-Zn]                          | 0.00000                                              | -0.57423                               |
| ECM1       | Q16610      | Extracellular matrix protein 1                        | 1.65417                                              | -0.88092                               |

58

59

60

61

**Supplementary Table 2.** List of selected proteins from the secretome of primary human skin fibroblasts that show no significant changes between control conditions and those treated with P2+P5.
